# Supplementary material
Source: publisher figshare collection journal article supplement (https://springernature.figshare.com/ndownloader/files/22406370)
Supplement: Supplementary file 1 [file 22406370]

## Sheet: Variable identification
Original name in raw data	Clean data identificator	Variable description
Delta_CD4_year1	W52 CD4 T cells- W0 CD4 T cells	Delta_CD4_year1
LeucocitosS0	W0 leucocytes	Week 0 leucocyte count (/10^3 mL)
HematocritoS0	W0 HCT	Week 0 hematocrit
PlaquetasS0	W0 PLT	Week 0 platelet count (10^3/mL)
GlucosaS0	W0 FB glu	Week 0 glucose (mg/100mL)
Acido_uricoS0	W0 uric acid	Week 0 uric acid (mg/100mL)
CreatininaS0	W0 Cr	Week 0 creatinine (mg/100mL)
CD4porcentajeS0	W0 %CD4	Week 0 %CD4 T cells
CD8_S0	W0 CD8 T cells	Week 0 CD8 Tcells/mm^3 blood
CD8porcentajeS0	W0 % CD8	Week 0% CD8 T cells
CocCD4_CD8_S0	W0 CD4/CD8	Week 0 CD4/CD8 ratio
CD4_S08	W8 CD4 T cells	Week 8 CD4 T cells/mm^3 blood
CD4porcentajeS08	W8 %CD4	Week 8 %CD4 T cells
CD8_S08	W8 CD8 T cells	Week 8 CD8 T cells /mm^3 blood
CD8porcentajeS08	W8 % CD8	Week 8 % CD8 T cells
CocCD4_CD8_S08	W8 CD4/CD8	Week 8 CD4/CD8 ratio
CD4_S12	W8 CD4 T cells	Week 12 CD4 T cells/mm^3 blood
CD4porcentajeS12	W8 %CD4	Week 12 %CD4 T cells
CD8_S12	W8 CD8 T cells	Week 12 CD8 T cells /mm^3 blood
CD8porcentajeS12	W8 % CD8	Week 12 % CD8 T cells
CocCD4_CD8_S12	W8 CD4/CD8	Week 12 CD4/CD8 ratio
GlucosaS24	W24 FB Glu	Week 24 glucose (mg/100mL)
UreaS24	W24 urea	Week 24 urea (mg/100mL)
Acido_uricoS24	W24 uric acid	Week 24 uric acid (mg/100mL)
CreatininaS24	W24 Cr	Week eek 24 creatinine (mg/100mL)
Bili_dirS24	W24 D Bli	Week 24 direct bilirubin (mg/100mL)
TGO_S24	W24 AST	Week 24 aspartate transaminase (IU/L)
TGP_S24	W24 ALT	Week 24 alanine transaminase (IU/L)
LDH_S24	W24 LDH	Week 24 lactate dehydrogenase (IU/L)
Fosf_alcS24	W24 ALP	Week 24 alkaline phosphatase (IU/L)
ColesterolS24	W24 chol	Week 24 cholesterol (mg/100mL)
TrigliceridosS24	W24 TGL	Week 24 triglycerides (mg/dL)
CD4_S24	W24 CD4 T cells	Week 24 CD4 T cells/mm^3 blood
CD4porcentajeS24	W24 %CD4	Week 24 %CD4 T cells
CD8_S24	W24 CD8 T cells	Week 24 CD8 T mm^3 blood
CD8porcentajeS24	W24 %CD8	Week 24% CD8 T cells
CocCD4_CD8_S24	W24 CD4/CD8	Week 24 CD4/CD8 ratio
CD4_S39	W24 CD4 T cells	Week 39 CD4 T cells/mm^3 blood
CD4porcentajeS39	W24 %CD4	Week 39 %CD4 T cells
CD8_S39	W24 CD8 T cells	Week 39 CD8 T mm^3 blood
CD8porcentajeS39	W24 %CD8	Week 39 % CD8 T cells
CocCD4_CD8_S39	W24 CD4/CD8	Week 39 CD4/CD8 ratio
CD4porcentajeS52	W24 %CD4	Week 52 %CD4 T cells
CD8_S52	W24 CD8 T cells	Week 52 CD8 T mm^3 blood
CD8porcentajeS52	W24 %CD8	Week 52 % CD8 T cells
CocCD4_CD8_S52	W24 CD4/CD8	Week 52 CD4/CD8 ratio
Num_eventos_6_meses	Clin_events_W0toW24	Clinical events in first six months
Edad	Age	Age
CV_S000	W0 VL	Week 0 viral load (HIV RNA copies/mL blood)
CV_S008	W8 VL	Week 8 viral load (HIV RNA copies/mL blood)
CV_S012	W12 VL	Week 0 viral load (HIV RNA copies/mL blood)
CV_S039	W39 VL	Week 0 viral load (HIV RNA copies/mL blood)
CV_S052	W52 VL	Week 0 viral load (HIV RNA copies/mL blood)
